# Supplementary figures and images for: Drug-Coated Balloon Treatment for ACS Induced by Myocardial Bridging: An Intravascular Ultrasound-Guided PCI
Source: PubMed Central journal article supplement — CJC Open. 2020 Nov 3;3(3):372–5. doi: 10.1016/j.cjco.2020.10.013 (PMC7984997; doi:10.1016/j.cjco.2020.10.013), 2020-11-03

**Supplementary Figure S1.** Electrocardiogram at the index hospitalization.

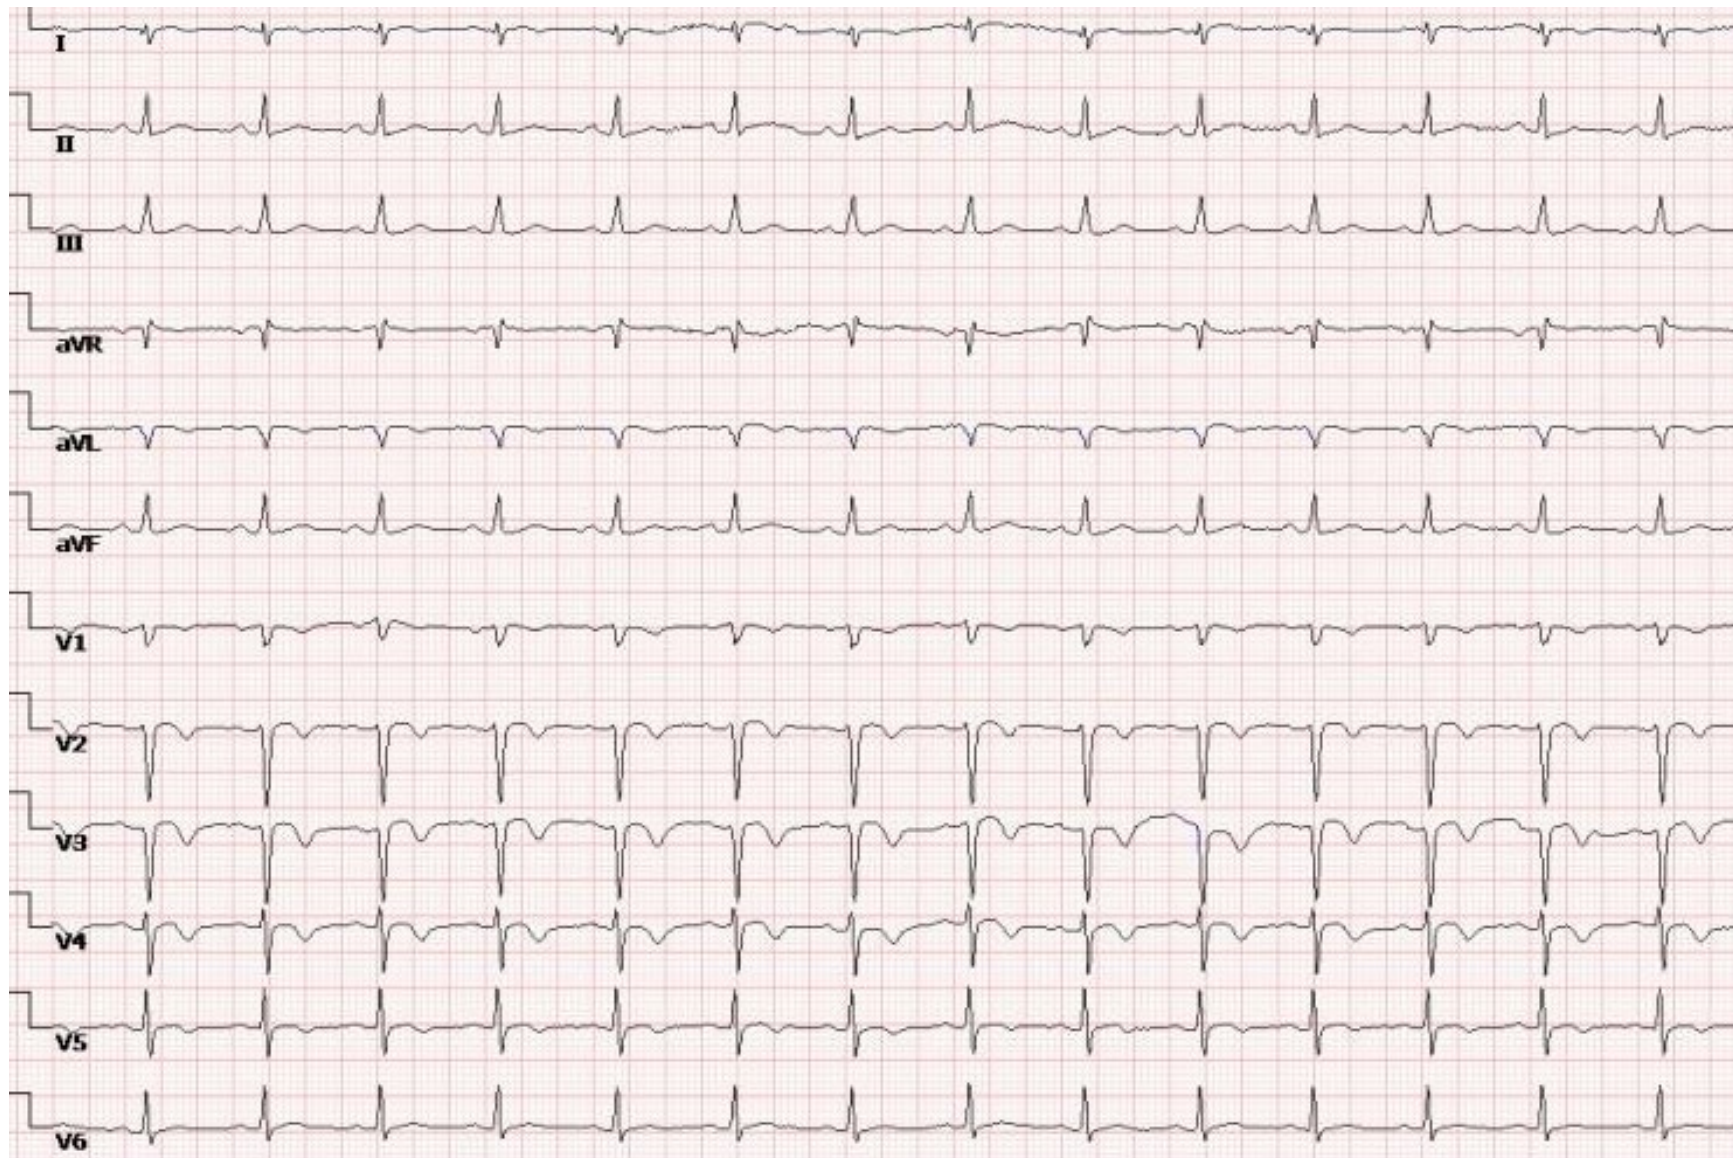

Supplement: mmc1.pdf [file mmc1.pdf]
